# Supplementary material
Source: PubMed Central journal article supplement (PMC7526723)
Supplement: awaa219_supplementary_data.pdf [file awaa219_supplementary_data.pdf]

## **Supplementary Tables**

**Supplementary Table 1. Cases from the UPENN CNDR and UK-ADC autopsy cohorts that were included/analyzed and not analyzed in the present study**

|              | UPENN CNDR included cases* | UPENN CNDR not included cases* | UKY-ADC included cases* | UKY-ADC not included cases* |
|--------------|----------------------------|--------------------------------|-------------------------|-----------------------------|
| LATE Stage 1 | 0                          | 55                             | 0                       | 16                          |
| LATE Stage 2 | 2                          | 101                            | 9                       | 156                         |
| LATE Stage 3 | 28                         | 32                             | 5                       | 7                           |

\*-See Methods for inclusion/exclusion criteria and rationales for case inclusion

**Supplementary Table 2. Neuropathologic Criteria for FTLD-TDP Subtypes**

| <b>Subtype</b> | <b>Histopathologic features</b>                                                                                                                                                                               | <b>Neocortical Layer Predominance</b> |
|----------------|---------------------------------------------------------------------------------------------------------------------------------------------------------------------------------------------------------------|---------------------------------------|
| A              | <ul style="list-style-type: none"><li>• Neuronal cytoplasmic inclusions</li><li>• Short dystrophic neurites</li><li>• Lentiform neuronal intranuclear inclusions typically present in low abundance</li></ul> | Superficial                           |
| B              | <ul style="list-style-type: none"><li>• Neuronal cytoplasmic inclusions, often granular</li><li>• Threads and dots</li></ul>                                                                                  | Superficial and deep                  |
| C              | <ul style="list-style-type: none"><li>• Long dystrophic neurites</li></ul>                                                                                                                                    | Superficial                           |
| D              | <ul style="list-style-type: none"><li>• Lentiform neuronal intranuclear inclusions</li><li>• Short dystrophic neurites</li></ul>                                                                              | Superficial                           |
| E              | <ul style="list-style-type: none"><li>• Weakly staining granulofilamentous neuronal cytoplasmic inclusions</li><li>• Fine grain-like deposits</li></ul>                                                       | Superficial and deep                  |

FTLD-TDP subtyping was accomplished by examination of neocortical sections stained for pTDP-43 (1D3 clone) using the morphologic criteria as described above. Detailed description and illustration of the histomorphological features, which were used as a guide for both UPENN and UKY raters, are provided in Lee al, PMID 28130640.

**Supplementary Table 3. Reproducibility of scoring between two different UK-ADC neuropathologists (one attending neuropathologist, one neuropathology fellow trainee) for different subtypes of TDP-43 proteinopathy in the UPENN cases (n=63), scored independently and blindly**

| <b>TDP-43 Pathologic feature<sup>1</sup></b> | <b>Reproducibility (<math>\kappa</math> values)<sup>2</sup></b> |
|----------------------------------------------|-----------------------------------------------------------------|
| <b>Ropy DN</b>                               | 0.77                                                            |
| <b>NCI</b>                                   | 0.64                                                            |
| <b>WM GCI</b>                                | 0.49                                                            |
| <b>Punctate DN</b>                           | 0.45                                                            |
| <b>NII</b>                                   | 0.36                                                            |
| <b>Compact PV</b>                            | 0.19                                                            |

<sup>1</sup> NCI=neuronal cytoplasmic inclusion; WM GCI=white matter glial cytoplasmic inclusion; NII=neuronal intranuclear inclusion; DN=various types of TDP-43 immunoreactive dystrophic neurites; Compact PV=compact perivascular lesions as described by Lin et al (33).

<sup>2</sup> Weighted Cohen's  $\kappa$  values between the UK-1 and UK-2 results were used to determine if the same score of specific pathologies were assigned by the two independent neuropathologists.

**Supplementary Table 4. Type Beta diagnostic frequency (UPENN case series)**

| <b>Group</b> | <b>UK-1</b> | <b>UK-2</b> | <b>UP-1</b> | <b>UP-2</b> | <b>UP-3</b> | <b>Average</b> | <b>Consensus<sup>1</sup></b> |
|--------------|-------------|-------------|-------------|-------------|-------------|----------------|------------------------------|
| LATE-NC      | 80%         | 50%         | 67%         | 53%         | 30%         | 56%            | 57%                          |
| FTLD-TDP     | 18%         | 33%         | 21%         | 15%         | 6%          | 19%            | 12%                          |

<sup>1</sup> Consensus reports the presence of Type Beta when 3 of 5 concur.

**Supplementary Table 5. Weighted Cohen's  $\kappa$  for Type Beta diagnosis (UPENN case series)**

| <b>Tester</b> | <b>UK-1</b> | <b>UK-2</b> | <b>UP-1</b> | <b>UP-2</b> | <b>UP-3</b> |
|---------------|-------------|-------------|-------------|-------------|-------------|
| <b>UK-1</b>   | 1.00        | -0.01       | 0.20        | 0.32        | 0.25        |
| <b>UK-2</b>   | -0.02       | 1.00        | 0.32        | 0.36        | 0.18        |
| <b>UP-1</b>   | 0.20        | 0.32        | 1.00        | 0.53        | 0.37        |
| <b>UP-2</b>   | 0.32        | 0.36        | 0.53        | 1.00        | 0.59        |
| <b>UP-3</b>   | 0.25        | 0.18        | 0.37        | 0.59        | 1.00        |

**Supplementary Table 6. Case-level data on TDP-43 proteinopathy subtypes.**

| Case # | UPENN primary diagnosis | Area type:<br>A-amygdala;<br>C- cingulate;<br>T- Temporal;<br>F- frontal | Typical NCI | GFNI-type NCI | NIIIs | WM GCIs | PV compact | Ropy DNs | "C"-type DNs | Small/punctate DNs | Alpha/Beta? | Type (A-C) | Type (A-E) | UKy blind diagnoses |
|--------|-------------------------|--------------------------------------------------------------------------|-------------|---------------|-------|---------|------------|----------|--------------|--------------------|-------------|------------|------------|---------------------|
| 064    | LATE                    | A                                                                        | 3           | 2             | 0     | 2       | 2          | 3        | 0            | 2                  | BETA        |            |            | LATE                |
| 064    | LATE                    | C                                                                        | 1           | 0             | 0     | 0       | 1          | 2        | 0            | 1                  |             |            |            |                     |
| 064    | LATE                    | T                                                                        | 1           | 0             | 0     | 0       | 0          | 0        | 0            | 1                  |             |            |            |                     |
| 064    | LATE                    | F                                                                        | 2           | 2             | 0     | 2       | 1          | 3        | 0            | 1                  |             |            |            |                     |
| 005    | LATE                    | C                                                                        | 1           | 0             | 0     | 0       | 1          | 0        | 0            | 0                  |             |            |            | LATE                |
| 005    | LATE                    | T                                                                        | 0           | 0             | 0     | 0       | 0          | 0        | 0            | 0                  |             |            |            |                     |
| 005    | LATE                    | F                                                                        | 1           | 0             | 0     | 0       | 0          | 0        | 0            | 0                  |             |            |            |                     |
| 005    | LATE                    | A                                                                        | 2           | 0             | 0     | 1       | 1          | 1        | 0            | 0                  | BETA        | A          | A          |                     |
| 069    | LATE                    | T                                                                        | 2           | 1             | 1     | 0       | 1          | 1        | 0            | 1                  |             | A          | A          | LATE                |
| 069    | LATE                    | C                                                                        | 2           | 0             | 0     | 0       | 1          | 1        | 0            | 1                  |             | A          | A          |                     |
| 069    | LATE                    | A                                                                        | 3           | 2             | 0     | 0       | 2          | 3        | 0            | 3                  | BETA        | A          | A          |                     |
| 069    | LATE                    | F                                                                        | 2           | 2             | 0     | 1       | 1          | 1        | 0            | 1                  |             |            |            |                     |
| 090    | LATE                    | F                                                                        | 2           | 0             | 0     | 0       | 2          | 1        | 0            | 1                  |             |            |            | FTLD                |
| 090    | LATE                    | T                                                                        | 2           | 0             | 0     | 0       | 1          | 1        | 0            | 1                  |             |            |            |                     |
| 090    | LATE                    | C                                                                        | 3           | 0             | 1     | 1       | 2          | 3        | 0            | 2                  |             | A          | A          |                     |
| 090    | LATE                    | A                                                                        | 3           | 2             | 1     | 2       | 2          | 3        | 0            | 3                  | BETA        |            |            |                     |
| 053    | LATE                    | C                                                                        | 2           | 0             | 0     | 2       | 1          | 2        | 0            | 1                  |             |            |            | LATE                |
| 053    | LATE                    | T                                                                        | 2           | 2             | 0     | 1       | 2          | 3        | 0            | 2                  |             |            |            |                     |
| 053    | LATE                    | F                                                                        | 2           | 1             | 0     | 2       | 2          | 3        | 0            | 1                  |             | A          | A          |                     |
| 053    | LATE                    | A                                                                        | 2           | 1             | 0     | 0       | 1          | 1        | 0            | 1                  |             |            |            |                     |
| 137    | FTLD-TDP                | F                                                                        | 3           | 1             | 1     | 2       | 2          | 3        | 0            | 1                  |             | A          | A          | FTLD                |
| 137    | FTLD-TDP                | T                                                                        | 3           | 2             | 1     | 2       | 2          | 3        | 0            | 3                  |             | A          | A          |                     |
| 137    | FTLD-TDP                | A                                                                        | 3           | 2             | 1     | 2       | 2          | 3        | 0            | 3                  |             | A          | A          |                     |
| 137    | FTLD-TDP                | C                                                                        | 3           | 3             | 1     | 2       | 2          | 3        | 0            | 3                  |             | A          | A          |                     |
| 170    | FTLD-TDP                | F                                                                        | 3           | 1             | 1     | 2       | 2          | 3        | 0            | 3                  |             | A          | A          | FTLD                |
| 170    | FTLD-TDP                | T                                                                        | 2           | 2             | 0     | 2       | 2          | 3        | 2            | 3                  |             | A          | A          |                     |
| 170    | FTLD-TDP                | A                                                                        | 3           | 1             | 1     | 3       | 2          | 3        | 0            | 3                  |             | A          | A          |                     |
| 170    | FTLD-TDP                | C                                                                        | 3           | 1             | 1     | 2       | 2          | 3        | 1            | 3                  |             | A          | A          |                     |

|     |          |   |   |   |   |   |   |   |   |   |       |   |   |      |
|-----|----------|---|---|---|---|---|---|---|---|---|-------|---|---|------|
| 149 | FTLD-TDP | C | 2 | 0 | 0 | 0 | 1 | 3 | 3 | 1 |       | C | C | FTLD |
| 149 | FTLD-TDP | T | 2 | 0 | 0 | 0 | 0 | 2 | 3 | 1 |       | C | C |      |
| 149 | FTLD-TDP | A | 3 | 0 | 0 | 0 | 0 | 3 | 3 | 2 | BETA  | C | C |      |
| 149 | FTLD-TDP | F | 1 | 0 | 0 | 0 | 0 | 2 | 2 | 0 |       | C | C |      |
| 034 | LATE     | F | 0 | 0 | 0 | 0 | 0 | 0 | 0 | 0 |       | A | A | LATE |
| 034 | LATE     | C | 2 | 0 | 0 | 0 | 2 | 2 | 0 | 1 |       | A | A |      |
| 034 | LATE     | T | 1 | 0 | 0 | 0 | 2 | 1 | 0 | 0 |       | A | A |      |
| 034 | LATE     | A | 3 | 3 | 0 | 1 | 2 | 3 | 0 | 3 |       | A | A |      |
| 108 | FTLD-TDP | F | 1 | 0 | 0 | 0 | 0 | 2 | 3 | 1 |       | C | C | FTLD |
| 108 | FTLD-TDP | C | 2 | 0 | 0 | 0 | 0 | 3 | 3 | 1 |       | C | C |      |
| 108 | FTLD-TDP | T | 2 | 0 | 0 | 1 | 1 | 3 | 3 | 1 |       | C | C |      |
| 108 | FTLD-TDP | A | 3 | 2 | 0 | 1 | 2 | 3 | 3 | 3 | BETA  | C | C |      |
| 097 | #N/A     | T | 1 | 2 | 0 | 2 | 0 | 1 | 0 | 3 |       | B | B | FTLD |
| 097 | #N/A     | A | 3 | 3 | 0 | 0 | 0 | 1 | 0 | 3 | BETA  | B | B |      |
| 097 | #N/A     | C | 1 | 3 | 0 | 0 | 0 | 0 | 0 | 3 |       | B | B |      |
| 018 | LATE     | T | 2 | 0 | 0 | 1 | 2 | 3 | 0 | 1 |       | A | A | LATE |
| 018 | LATE     | C | 1 | 0 | 0 | 0 | 2 | 1 | 0 | 1 |       | A | A |      |
| 018 | LATE     | A | 3 | 2 | 0 | 0 | 2 | 3 | 0 | 3 | BETA  | A | A |      |
| 018 | LATE     | F | 0 | 0 | 0 | 0 | 1 | 0 | 0 | 0 |       | A | A |      |
| 025 | FTLD-TDP | A | 2 | 3 | 0 | 2 | 0 | 2 | 0 | 3 | ALPHA | B | B | FTLD |
| 025 | FTLD-TDP | F | 3 | 3 | 0 | 2 | 0 | 2 | 0 | 3 |       | B | B |      |
| 025 | FTLD-TDP | C | 2 | 3 | 0 | 2 | 0 | 2 | 0 | 1 |       | B | B |      |
| 025 | FTLD-TDP | T | 2 | 1 | 0 | 1 | 0 | 0 | 0 | 0 |       | ? | ? |      |
| 047 | FTLD-TDP | A | 2 | 0 | 0 | 0 | 2 | 2 | 0 | 1 |       | A | A | LATE |
| 047 | FTLD-TDP | F | 0 | 0 | 0 | 0 | 0 | 0 | 0 | 0 |       |   |   |      |
| 047 | FTLD-TDP | T | 0 | 0 | 0 | 0 | 1 | 1 | 0 | 0 |       |   |   |      |
| 047 | FTLD-TDP | A | 3 | 1 | 0 | 1 | 1 | 3 | 0 | 2 | BETA  | A | A |      |
| 070 | FTLD-TDP | F | 2 | 2 | 0 | 0 | 0 | 1 | 0 | 2 |       | A | A | FTLD |
| 070 | FTLD-TDP | C | 3 | 1 | 1 | 2 | 1 | 3 | 0 | 3 |       | A | A |      |
| 070 | FTLD-TDP | T | 3 | 1 | 2 | 2 | 1 | 3 | 0 | 3 |       | A | A |      |
| 070 | FTLD-TDP | A | 3 | 3 | 1 | 1 | 1 | 3 | 0 | 3 | ALPHA | A | A |      |
| 039 | LATE     | A | 3 | 3 | 1 | 2 | 2 | 3 | 0 | 3 | BETA  |   |   | LATE |
| 039 | LATE     | C | 2 | 0 | 0 | 1 | 2 | 2 | 0 | 1 |       |   |   |      |

|     |          |   |   |   |   |   |   |   |   |   |       |   |   |      |
|-----|----------|---|---|---|---|---|---|---|---|---|-------|---|---|------|
| 039 | LATE     | F | 1 | 0 | 0 | 1 | 1 | 1 | 0 | 1 |       |   |   |      |
| 039 | LATE     | T | 2 | 0 | 0 | 2 | 0 | 2 | 0 | 1 |       | A | A |      |
| 158 | FTLD-TDP | F | 3 | 3 | 0 | 2 | 0 | 1 | 0 | 3 |       | B | B | FTLD |
| 158 | FTLD-TDP | C | 2 | 3 | 0 | 2 | 0 | 1 | 0 | 3 |       | B | B |      |
| 158 | FTLD-TDP | T | 2 | 3 | 0 | 2 | 0 | 1 | 0 | 3 |       | B | B |      |
| 158 | FTLD-TDP | A | 3 | 3 | 0 | 0 | 0 | 3 | 0 | 3 | ALPHA | B | B |      |
| 208 | FTLD-TDP | T | 2 | 0 | 0 | 1 | 0 | 3 | 0 | 2 |       | B | B | FTLD |
| 208 | FTLD-TDP | C | 3 | 0 | 1 | 1 | 2 | 3 | 0 | 3 |       | B | B |      |
| 208 | FTLD-TDP | A | 3 | 1 | 1 | 2 | 2 | 3 | 0 | 3 | ALPHA | B | B |      |
| 208 | FTLD-TDP | F | 2 | 0 | 1 | 2 | 1 | 3 | 0 | 1 |       | B | B |      |
| 218 | FTLD-TDP | C | 3 | 0 | 1 | 1 | 1 | 1 | 0 | 1 |       | A | A | FTLD |
| 218 | FTLD-TDP | F | 3 | 2 | 1 | 2 | 0 | 2 | 0 | 1 |       | A | A |      |
| 218 | FTLD-TDP | T | 2 | 0 | 0 | 1 | 0 | 1 | 0 | 0 |       | A | A |      |
| 218 | FTLD-TDP | A | 1 | 3 | 0 | 2 | 0 | 1 | 0 | 3 | ALPHA | B | B |      |
| 066 | FTLD-TDP | A | 2 | 0 | 0 | 0 | 2 | 1 | 0 | 1 | BETA  | A | A | LATE |
| 066 | FTLD-TDP | F | 0 | 0 | 0 | 0 | 0 | 0 | 0 | 0 |       |   |   |      |
| 066 | FTLD-TDP | C | 0 | 0 | 0 | 0 | 0 | 0 | 0 | 0 |       |   |   |      |
| 066 | FTLD-TDP | T | 0 | 0 | 0 | 0 | 0 | 0 | 0 | 0 |       |   |   |      |
| 074 | LATE     | A | 3 | 2 | 0 | 1 | 2 | 3 | 0 | 3 | ALPHA |   |   | LATE |
| 074 | LATE     | T | 2 | 0 | 0 | 1 | 1 | 2 | 0 | 0 |       |   |   |      |
| 074 | LATE     | F | 1 | 0 | 0 | 0 | 0 | 0 | 0 | 0 |       |   |   |      |
| 074 | LATE     | C | 1 | 0 | 0 | 0 | 1 | 1 | 0 | 0 |       |   |   |      |
| 274 | LATE     | T | 2 | 1 | 0 | 0 | 1 | 2 | 0 | 1 |       | A | A | LATE |
| 274 | LATE     | A | 3 | 1 | 0 | 0 | 2 | 0 | 0 | 3 | BETA  |   |   |      |
| 274 | LATE     | F | 1 | 0 | 0 | 0 | 0 | 0 | 0 | 0 |       |   |   |      |
| 274 | LATE     | C | 1 | 1 | 0 | 0 | 0 | 0 | 0 | 0 |       |   |   |      |
| 033 | FTLD-TDP | A | 3 | 3 | 0 | 2 | 1 | 2 | 0 | 0 | ALPHA |   |   | FTLD |
| 033 | FTLD-TDP | C | 3 | 0 | 0 | 1 | 1 | 2 | 0 | 0 |       | A | A |      |
| 033 | FTLD-TDP | T | 3 | 0 | 1 | 1 | 1 | 2 | 0 | 0 |       | A | A |      |
| 033 | FTLD-TDP | F | 3 | 0 | 1 | 2 | 1 | 2 | 0 | 0 |       | A | A |      |
| 068 | FTLD-TDP | T | 1 | 0 | 0 | 0 | 0 | 1 | 0 | 1 |       |   |   | LATE |
| 068 | FTLD-TDP | F | 1 | 0 | 0 | 0 | 0 | 1 | 0 | 0 |       |   |   |      |
| 068 | FTLD-TDP | C | 1 | 0 | 0 | 1 | 1 | 1 | 0 | 1 |       |   |   |      |



|     |          |   |   |   |   |     |     |   |   |   |      |   |   |      |
|-----|----------|---|---|---|---|-----|-----|---|---|---|------|---|---|------|
| 068 | FTLD-TDP | A | 3 | 1 | 0 | 1   | 2   | 3 | 0 | 1 | BETA |   |   |      |
| 022 | LATE     | F | 1 | 0 | 0 | 1   | 1   | 1 | 0 | 2 |      |   |   | LATE |
| 022 | LATE     | F |   |   |   |     |     |   |   |   |      |   |   |      |
| 022 | LATE     | C | 2 | 0 | 0 | 0   | 1   | 2 | 0 | 1 |      | A | A |      |
| 022 | LATE     | A | 2 | 1 | 0 | 1   | 1   | 2 | 0 | 1 | BETA |   |   |      |
| 022 | LATE     | T | 2 | 0 | 1 | 1   | 1   | 2 | 0 | 2 |      | A | A |      |
| 063 | LATE     | C | 1 | 0 | 0 | 0   | 0   | 0 | 0 | 0 |      |   |   | LATE |
| 063 | LATE     | T | 1 | 0 | 0 | 1   | 1   | 1 | 0 | 0 |      |   |   |      |
| 063 | LATE     | A | 3 | 3 | 0 | 2   | 1   | 3 | 0 | 3 | BETA |   |   |      |
| 063 | LATE     | F | 0 | 0 | 0 | 0   | 0   | 0 | 0 | 0 |      |   |   |      |
| 033 | FTLD-TDP | C | 2 | 0 | 1 | 1   | 3   | 2 | 0 | 2 |      |   |   | LATE |
| 033 | FTLD-TDP | A | 3 | 1 | 1 | 1   | 2   | 3 | 0 | 3 | BETA |   |   |      |
| 033 | FTLD-TDP | F | 2 | 0 | 1 | 1   | 2   | 3 | 0 | 2 |      |   |   |      |
| 033 | FTLD-TDP | T | 2 | 0 | 1 | 0   | 2   | 1 | 0 | 2 |      |   |   |      |
| 040 | LATE     | F | 0 | 0 | 0 | 0   | 0   | 0 | 0 | 0 |      |   |   | LATE |
| 040 | LATE     | C | 1 | 0 | 0 | 0   | 0/1 | 0 | 0 | 0 |      |   |   |      |
| 040 | LATE     | A | 3 | 2 | 0 | 2   | 1   | 2 | 0 | 2 | BETA |   |   |      |
| 040 | LATE     | T | 0 | 0 | 0 | 0   | 0   | 0 | 0 | 0 |      |   |   |      |
| 174 | LATE     | A | 2 | 0 | 0 | 1   | 1   | 2 | 0 | 1 | BETA | A | A | LATE |
| 174 | LATE     | T | 2 | 1 | 0 | 2   | 1   | 2 | 0 | 2 |      | A | A |      |
| 174 | LATE     | F | 0 | 0 | 0 | 0   | 0   | 0 | 0 | 0 |      | A | A |      |
| 174 | LATE     | C | 1 | 0 | 0 | 0   | 0   | 1 | 0 | 1 |      | A | A |      |
| 202 | LATE     | F | 0 | 0 | 0 | 0   | 0   | 0 | 0 | 0 |      |   |   | LATE |
| 202 | LATE     | T | 1 | 0 | 0 | 0   | 1   | 1 | 0 | 0 |      |   |   |      |
| 202 | LATE     | C | 1 | 0 | 0 | 0   | 1   | 0 | 0 | 0 |      |   |   |      |
| 202 | LATE     | A | 2 | 1 | 1 | 1   | 2   | 2 | 0 | 2 |      |   |   |      |
| 269 | FTLD-TDP | F | 2 | 0 | 0 | 1   | 1   | 2 | 0 | 1 |      | A | A | LATE |
| 269 | FTLD-TDP | T | 2 | 0 | 0 | 2   | 2   | 2 | 0 | 2 |      | A | A |      |
| 269 | FTLD-TDP | C | 1 | 0 | 1 | 1   | 2   | 1 | 0 | 2 |      | A | A |      |
| 269 | FTLD-TDP | A | 3 | 2 | 0 | 2   | 2   | 3 | 0 | 3 | BETA | A | A |      |
| 051 | LATE     | C | 1 | 1 | 0 | 1   | 1   | 0 | 0 | 1 |      | A | A | LATE |
| 051 | LATE     | A | 3 | 0 | 0 | N/A | 2   | 2 | 0 | 3 | BETA | A | A |      |
| 051 | LATE     | T | 3 | 0 | 0 | 1   | 1   | 2 | 0 | 2 |      | A | A |      |

|     |          |   |   |   |   |   |   |   |   |   |       |   |   |      |
|-----|----------|---|---|---|---|---|---|---|---|---|-------|---|---|------|
| 051 | LATE     | F | 1 | 0 | 0 | 0 | 0 | 0 | 0 | 1 |       | A | A |      |
| 155 | LATE     | F | 2 | 0 | 0 | 2 | 2 | 1 | 0 | 1 |       | A | A | LATE |
| 155 | LATE     | T | 2 | 1 | 1 | 1 | 2 | 2 | 0 | 2 |       | A | A |      |
| 155 | LATE     | C | 2 | 0 | 1 | 1 | 3 | 2 | 0 | 2 |       | A | A |      |
| 155 | LATE     | A | 3 | 1 | 2 | 2 | 3 | 3 | 0 | 3 | BETA  | A | A |      |
| 245 | LATE     | A | 2 | 0 | 0 | 1 | 1 | 2 | 0 | 2 | BETA  | A | A | LATE |
| 245 | LATE     | T | 2 | 0 | 1 | 1 | 2 | 2 | 0 | 2 |       | A | A |      |
| 245 | LATE     | F | 0 | 0 | 0 | 0 | 0 | 0 | 0 | 0 |       | A | A |      |
| 245 | LATE     | C | 2 | 0 | 0 | 0 | 2 | 1 | 0 | 1 |       | A | A |      |
| 194 | FTLD-TDP | F | 2 | 2 | 0 | 2 | 0 | 1 | 0 | 3 |       | B | E | FTLD |
| 194 | FTLD-TDP | T | 2 | 3 | 0 | 2 | 2 | 1 | 0 | 3 |       | B | E |      |
| 194 | FTLD-TDP | C | 2 | 3 | 0 | 2 | 2 | 1 | 0 | 3 |       | B | E |      |
| 194 | FTLD-TDP | A | 2 | 3 | 0 | 1 | 2 | 1 | 0 | 3 | ALPHA |   |   |      |
| 068 | FTLD-TDP | F | 2 | 0 | 0 | 0 | 0 | 2 | 2 | 0 |       | C | C | FTLD |
| 068 | FTLD-TDP | C | 1 | 0 | 0 | 0 | 1 | 2 | 3 | 2 |       | C | C |      |
| 068 | FTLD-TDP | A | 2 | 0 | 0 | 1 | 2 | 2 | 2 | 1 | ALPHA | C | C |      |
| 068 | FTLD-TDP | T | 1 | 0 | 0 | 0 | 1 | 2 | 3 | 1 |       | C | C |      |
| 087 | FTLD-TDP | A | 2 | 3 | 0 | 3 | 0 | 1 | 0 | 3 | ALPHA | B | E | FTLD |
| 087 | FTLD-TDP | C | 1 | 3 | 0 | 2 | 0 | 1 | 0 | 3 |       | B | E |      |
| 087 | FTLD-TDP | T | 1 | 3 | 0 | 2 | 0 | 1 | 0 | 3 |       | B | E |      |
| 087 | FTLD-TDP | F | 0 | 3 | 0 | 2 | 0 | 0 | 0 | 3 |       | B | E |      |
| 129 | FTLD-TDP | F | 3 | 0 | 1 | 2 | 0 | 3 | 0 | 1 |       | A | A | FTLD |
| 129 | FTLD-TDP | T | 3 | 0 | 2 | 3 | 1 | 3 | 0 | 3 |       | A | A |      |
| 129 | FTLD-TDP | C | 3 | 0 | 2 | 3 | 2 | 3 | 0 | 3 |       | A | A |      |
| 129 | FTLD-TDP | A | 3 | 2 | 1 | 2 | 2 | 3 | 0 | 3 | BETA  | A | A |      |
| 207 | FTLD-TDP | C | 2 | 0 | 1 | 1 | 1 | 2 | 0 | 1 |       | A |   | LATE |
| 207 | FTLD-TDP | A | 3 | 2 | 1 | 1 | 1 | 3 | 0 | 3 |       |   |   |      |
| 207 | FTLD-TDP | T | 2 | 0 | 1 | 2 | 1 | 3 | 0 | 3 |       | A |   |      |
| 207 | FTLD-TDP | F | 2 | 0 | 1 | 1 | 1 | 3 | 0 | 1 |       | A |   |      |
| 008 | FTLD-TDP | C | 2 | 3 | 0 | 2 | 0 | 0 | 0 | 3 |       | B |   | FTLD |
| 008 | FTLD-TDP | A | 1 | 3 | 0 | 2 | 0 | 0 | 0 | 3 | ALPHA | B |   |      |
| 008 | FTLD-TDP | T | 1 | 3 | 0 | 1 | 0 | 0 | 0 | 3 |       | B | E |      |
| 008 | FTLD-TDP | F | 1 | 3 | 0 | 1 | 0 | 0 | 0 | 3 |       | B | E |      |

|     |          |   |   |   |   |   |   |   |   |   |       |     |     |      |
|-----|----------|---|---|---|---|---|---|---|---|---|-------|-----|-----|------|
| 148 | FTLD-TDP | A | 3 | 2 | 2 | 2 | 2 | 3 | 0 | 3 | BETA  |     |     | FTLD |
| 148 | FTLD-TDP | T | 3 | 0 | 2 | 2 | 1 | 3 | 0 | 2 |       | A   |     |      |
| 148 | FTLD-TDP | F | 3 | 0 | 2 | 2 | 1 | 3 | 0 | 1 |       | A   |     |      |
| 148 | FTLD-TDP | C | 3 | 0 | 2 | 2 | 3 | 3 | 0 | 3 |       | A   |     |      |
| 038 | LATE     | T | 2 | 2 | 0 | 1 | 2 | 3 | 0 | 1 |       | A   | A   | LATE |
| 038 | LATE     | A | 3 | 3 | 0 | 2 | 2 | 3 | 0 | 3 | BETA  | A   | A   |      |
| 038 | LATE     | F | 1 | 0 | 0 | 0 | 1 | 0 | 0 | 0 |       | A   | A   |      |
| 038 | LATE     | C | 1 | 2 | 0 | 0 | 1 | 1 | 0 | 1 |       | A   | A   |      |
| 029 | LATE     | T | 2 | 0 | 0 | 0 | 1 | 3 | 0 | 2 |       | A   | A   | LATE |
| 029 | LATE     | A | 3 | 0 | 0 | 0 | 2 | 3 | 0 | 3 | BETA  |     |     |      |
| 029 | LATE     | F | 0 | 0 | 0 | 0 | 0 | 0 | 0 | 0 |       | A   | A   |      |
| 029 | LATE     | C | 1 | 0 | 0 | 0 | 1 | 2 | 0 | 1 |       | A   | A   |      |
| 044 | FTLD-TDP | C | 2 | 2 | 1 | 2 | 2 | 3 | 0 | 3 |       | A   | A   | FTLD |
| 044 | FTLD-TDP | T | 2 | 2 | 2 | 2 | 1 | 3 | 0 | 3 |       | A   | A   |      |
| 044 | FTLD-TDP | F | 3 | 0 | 2 | 2 | 2 | 3 | 0 | 1 |       | A   | A   |      |
| 044 | FTLD-TDP | A | 2 | 3 | 1 | 2 | 2 | 3 | 0 | 3 |       | A   | A   |      |
| 047 | FTLD-TDP | T | 1 | 3 | 0 | 0 | 0 | 1 | 0 | 3 |       | B   | E   | FTLD |
| 047 | FTLD-TDP | A | 2 | 3 | 0 | 1 | 0 | 2 | 0 | 3 | ALPHA | A   | A   |      |
| 047 | FTLD-TDP | C | 3 | 3 | 1 | 1 | 0 | 2 | 0 | 2 |       | A   | A   |      |
| 047 | FTLD-TDP | F | 2 | 2 | 0 | 1 | 0 | 1 | 0 | 1 |       | A/B | A/B |      |
| 062 | FTLD-TDP | F | 3 | 1 | 2 | 3 | 2 | 3 | 0 | 3 |       | A   | A   | FTLD |
| 062 | FTLD-TDP | A | 2 | 1 | 1 | 1 | 1 | 3 | 0 | 3 | ALPHA | A   | A   |      |
| 062 | FTLD-TDP | C | 3 | 1 | 1 | 1 | 1 | 3 | 0 | 3 |       | A   | A   |      |
| 062 | FTLD-TDP | T | 3 | 1 | 1 | 1 | 1 | 3 | 0 | 3 |       | A   | A   |      |
| 088 | FTLD-TDP | T | 3 | 0 | 2 | 1 | 0 | 3 | 0 | 0 |       | A   | A   | FTLD |
| 088 | FTLD-TDP | F | 2 | 0 | 1 | 1 | 0 | 3 | 0 | 1 |       | A   | A   |      |
| 088 | FTLD-TDP | A | 3 | 1 | 1 | 1 | 0 | 3 | 0 | 3 | ALPHA | A   | A   |      |
| 088 | FTLD-TDP | C | 2 | 1 | 0 | 1 | 0 | 2 | 0 | 2 |       | A   | A   |      |
| 116 | FTLD-TDP | A | 3 | 1 | 1 | 2 | 2 | 3 | 0 | 3 | ALPHA | A   | A   | FTLD |
| 116 | FTLD-TDP | C | 2 | 0 | 1 | 1 | 2 | 2 | 0 | 1 |       | A   | A   |      |
| 116 | FTLD-TDP | T | 3 | 0 | 1 | 1 | 2 | 3 | 0 | 1 |       | A   | A   |      |
| 116 | FTLD-TDP | F | 2 | 0 | 1 | 1 | 0 | 2 | 0 | 1 |       | A   | A   |      |
| 009 | FTLD-TDP | A | 2 | 1 | 2 | 2 | 1 | 3 | 0 | 2 | ALPHA | B   | B   | FTLD |

|     |          |   |   |   |   |   |   |   |   |   |         |   |   |      |
|-----|----------|---|---|---|---|---|---|---|---|---|---------|---|---|------|
| 009 | FTLD-TDP | C | 3 | 1 | 2 | 2 | 2 | 3 | 0 | 3 |         | B | B |      |
| 009 | FTLD-TDP | T | 2 | 1 | 1 | 1 | 1 | 3 | 0 | 2 |         | B | B |      |
| 009 | FTLD-TDP | F | 2 | 1 | 2 | 2 | 1 | 3 | 0 | 2 |         | B | B |      |
| 178 | FTLD-TDP | A | 2 | 0 | 0 | 0 | 0 | 1 | 0 | 1 | NEITHER |   |   | LATE |
| 178 | FTLD-TDP | C | 0 | 0 | 0 | 0 | 0 | 0 | 0 | 0 |         |   |   |      |
| 178 | FTLD-TDP | T | 0 | 0 | 0 | 0 | 0 | 0 | 0 | 0 |         |   |   |      |
| 178 | FTLD-TDP | F | 0 | 0 | 0 | 0 | 0 | 0 | 0 | 0 |         |   |   |      |
| 241 | FTLD-TDP | A | 2 | 1 | 1 | 1 | 2 | 3 | 0 | 3 | ALPHA   | A | A | FTLD |
| 241 | FTLD-TDP | C | 3 | 1 | 1 | 1 | 2 | 3 | 0 | 3 |         | A | A |      |
| 241 | FTLD-TDP | T | 3 | 1 | 2 | 2 | 2 | 3 | 0 | 3 |         | A | A |      |
| 241 | FTLD-TDP | F | 3 | 1 | 2 | 2 | 2 | 3 | 0 | 2 |         | A | A |      |
| 134 | FTLD-TDP | A | 1 | 0 | 0 | 0 | 0 | 2 | 1 | 1 | NEITHER | C | C | FTLD |
| 134 | FTLD-TDP | T | 2 | 0 | 0 | 1 | 0 | 3 | 1 | 1 |         | C | C |      |
| 134 | FTLD-TDP | C | 2 | 0 | 0 | 1 | 0 | 2 | 2 | 1 |         | C | C |      |
| 134 | FTLD-TDP | F | 1 | 0 | 0 | 0 | 0 | 2 | 2 | 1 |         | C | C |      |
| 151 | FTLD-TDP | T | 1 | 0 | 0 | 0 | 0 | 1 | 0 | 0 |         |   |   | LATE |
| 151 | FTLD-TDP | F | 0 | 0 | 0 | 0 | 0 | 0 | 0 | 0 |         |   |   |      |
| 151 | FTLD-TDP | A | 2 | 0 | 0 | 0 | 1 | 2 | 0 | 3 | BETA    |   |   |      |
| 151 | FTLD-TDP | C | 1 | 0 | 0 | 0 | 0 | 0 | 0 | 2 |         |   |   |      |
| 170 | FTLD-TDP | C | 1 | 0 | 0 | 1 | 1 | 1 | 0 | 1 |         |   |   | LATE |
| 170 | FTLD-TDP | T | 1 | 0 | 0 | 0 | 0 | 0 | 0 | 2 |         |   |   |      |
| 170 | FTLD-TDP | F | 2 | 0 | 1 | 1 | 1 | 2 | 0 | 1 |         | A | A |      |
| 170 | FTLD-TDP | A | 2 | 0 | 1 | 1 | 1 | 2 | 0 | 2 | BETA    |   |   |      |
| 066 | FTLD-TDP | A | 2 | 0 | 0 | 0 | 0 | 2 | 2 | 2 | ALPHA   |   |   | FTLD |
| 066 | FTLD-TDP | C | 3 | 0 | 1 | 0 | 0 | 3 | 3 | 1 |         | C | C |      |
| 066 | FTLD-TDP | T | 2 | 0 | 0 | 0 | 1 | 2 | 2 | 1 |         | C | C |      |
| 066 | FTLD-TDP | F | 1 | 0 | 0 | 0 | 1 | 2 | 3 | 1 |         | C | C |      |
| 129 | FTLD-TDP | A | 3 | 0 | 1 | 0 | 1 | 2 | 0 | 2 | BETA    | A | A | LATE |
| 129 | FTLD-TDP | F | 2 | 0 | 1 | 0 | 1 | 2 | 0 | 1 |         | A | A |      |
| 129 | FTLD-TDP | T | 2 | 0 | 0 | 0 | 1 | 1 | 0 | 1 |         | A | A |      |
| 129 | FTLD-TDP | C | 2 | 0 | 1 | 1 | 2 | 2 | 0 | 1 |         | A | A |      |
| 146 | FTLD-TDP | T | 2 | 0 | 1 | 1 | 1 | 3 | 0 | 1 |         | A | A | FTLD |
| 146 | FTLD-TDP | F | 3 | 0 | 2 | 2 | 2 | 3 | 0 | 1 |         | A | A |      |

|     |          |   |   |   |   |   |   |   |   |   |         |   |   |      |
|-----|----------|---|---|---|---|---|---|---|---|---|---------|---|---|------|
| 146 | FTLD-TDP | A | 2 | 1 | 1 | 1 | 1 | 3 | 0 | 2 | ALPHA   |   |   |      |
| 146 | FTLD-TDP | C | 3 | 0 | 1 | 1 | 2 | 3 | 0 | 2 |         | A | A |      |
| 151 | FTLD-TDP | A | 3 | 0 | 1 | 1 | 1 | 3 | 0 | 3 | ALPHA   |   |   | FTLD |
| 151 | FTLD-TDP | C | 3 | 1 | 1 | 2 | 1 | 3 | 0 | 3 |         | A | A |      |
| 151 | FTLD-TDP | F | 2 | 1 | 0 | 1 | 1 | 2 | 0 | 1 |         | A | A |      |
| 151 | FTLD-TDP | T | 2 | 0 | 0 | 0 | 0 | 1 | 0 | 1 |         | A | A |      |
| 163 | LATE     | T | 1 | 0 | 0 | 0 | 1 | 0 | 0 | 0 |         |   |   | LATE |
| 163 | LATE     | F | 0 | 0 | 0 | 0 | 0 | 0 | 0 | 0 |         |   |   |      |
| 163 | LATE     | A | 3 | 1 | 0 | 1 | 2 | 2 | 0 | 1 | BETA    |   |   |      |
| 163 | LATE     | C | 0 | 0 | 0 | 0 | 1 | 0 | 0 | 0 |         |   |   |      |
| 178 | FTLD-TDP | C | 3 | 0 | 1 | 2 | 2 | 3 | 0 | 3 |         |   |   | FTLD |
| 178 | FTLD-TDP | A | 3 | 0 | 1 | 1 | 1 | 3 | 0 | 3 |         |   |   |      |
| 178 | FTLD-TDP | T | 3 | 0 | 1 | 2 | 1 | 3 | 0 | 3 |         | A | A |      |
| 178 | FTLD-TDP | F | 3 | 0 | 1 | 2 | 1 | 3 | 0 | 3 |         | A | A |      |
| 208 | FTLD-TDP | A | 1 | 3 | 0 | 2 | 0 | 1 | 0 | 3 | NEITHER | B | B | FTLD |
| 208 | FTLD-TDP | C | 1 | 3 | 0 | 2 | 0 | 1 | 0 | 3 |         | B | B |      |
| 208 | FTLD-TDP | T | 1 | 3 | 0 | 2 | 0 | 1 | 0 | 3 |         | B | B |      |
| 208 | FTLD-TDP | F | 1 | 3 | 0 | 2 | 0 | 1 | 0 | 3 |         | B | B |      |
| 218 | FTLD-TDP | F | 1 | 0 | 0 | 0 | 0 | 2 | 2 | 1 |         | C | C | FTLD |
| 218 | FTLD-TDP | T | 2 | 0 | 0 | 1 | 0 | 2 | 0 | 1 |         | A | A |      |
| 218 | FTLD-TDP | C | 2 | 0 | 0 | 0 | 0 | 2 | 2 | 1 |         | C | C |      |
| 218 | FTLD-TDP | A | 3 | 0 | 0 | 1 | 0 | 2 | 0 | 1 | ALPHA   | A | A |      |
| 038 | LATE     | A | 3 | 2 | 1 | 1 | 1 | 2 | 0 | 2 | BETA    |   |   | LATE |
| 038 | LATE     | C | 3 | 0 | 1 | 1 | 1 | 1 | 0 | 1 |         | A | A |      |
| 038 | LATE     | T | 2 | 0 | 0 | 0 | 0 | 1 | 0 | 1 |         | A | A |      |
| 038 | LATE     | F | 1 | 0 | 0 | 0 | 0 | 0 | 0 | 0 |         | A | A |      |
| 075 | LATE     | A | 3 | 0 | 1 | 1 | 2 | 3 | 0 | 2 | ALPHA   | A | A | LATE |
| 075 | LATE     | T | 2 | 0 | 1 | 0 | 1 | 2 | 0 | 2 |         | A | A |      |
| 075 | LATE     | C | 2 | 0 | 1 | 0 | 2 | 2 | 0 | 2 |         | A | A |      |
| 075 | LATE     | F | 1 | 0 | 0 | 0 | 1 | 0 | 0 | 1 |         | A | A |      |

**Supplementary Table 7. p-TDP-43 immunohistochemical stains on the hippocampal formation.** (This Table is attached separately in Excel file format.)

| Case ID | UPENN Dx | Blinded UKY Dx | Alpha/ Beta consensus | Scores (TDP-43 pathology) * |                         |                   |               |
|---------|----------|----------------|-----------------------|-----------------------------|-------------------------|-------------------|---------------|
|         |          |                |                       | Amygdala                    | Cornu ammonis/subiculum | Entorhinal cortex | Dentate gyrus |
| Case 1  | FTLD-TDP | FTLD-TDP       | Alpha                 | 3                           | 2                       | 3                 | .             |
| Case 2  | FTLD-TDP | FTLD-TDP       | Alpha                 | .                           | 3                       | 3                 | 0             |
| Case 3  | FTLD-TDP | FTLD-TDP       | Alpha                 | .                           | 3                       | 2                 | 0             |
| Case 4  | FTLD-TDP | FTLD-TDP       | Alpha                 | 2                           | 3                       | 3                 | .             |
| Case 5  | FTLD-TDP | FTLD-TDP       | Alpha                 | 2                           | 3                       | 2                 | .             |
| Case 6  | FTLD-TDP | FTLD-TDP       | Alpha                 | 2                           | 2                       | 2                 | .             |
| Case 7  | FTLD-TDP | FTLD-TDP       | Alpha                 | 2                           | 3                       | 2                 | 0             |
| Case 8  | FTLD-TDP | FTLD-TDP       | Alpha                 | 2                           | 2                       | 3                 | .             |
| Case 9  | FTLD-TDP | FTLD-TDP       | Alpha                 | 3                           | 3                       | 3                 | 3             |
| Case 10 | FTLD-TDP | FTLD-TDP       | Alpha                 | 2                           | 1                       | 2                 | 1             |
| Case 11 | FTLD-TDP | FTLD-TDP       | Alpha                 | 0.5                         | 1                       | 1                 | 2             |
| Case 12 | FTLD-TDP | FTLD-TDP       | Alpha                 | 3                           | 1                       | 2                 | 2             |
| Case 13 | FTLD-TDP | FTLD-TDP       | Alpha                 | 1                           | 3                       | 1                 | 3             |
| Case 14 | FTLD-TDP | FTLD-TDP       | Alpha                 | 1                           | 1                       | 3                 | 3             |
| Case 15 | FTLD-TDP | FTLD-TDP       | Alpha                 | 1                           | 2                       | 0                 | 3             |
| Case 16 | FTLD-TDP | FTLD-TDP       | Alpha                 | 2                           | 1                       | 1                 | 1             |
| Case 17 | FTLD-TDP | FTLD-TDP       | Alpha                 | 2                           | 3                       | 3                 | 3             |
| Case 18 | FTLD-TDP | FTLD-TDP       | Alpha                 | 2                           | 0                       | 2                 | 0             |
| Case 19 | FTLD-TDP | FTLD-TDP       | Alpha                 | 2                           | 3                       | 3                 | 3             |
| Case 20 | FTLD-TDP | FTLD-TDP       | Alpha                 | 2                           | 1                       | 2                 | 2             |
| Case 21 | FTLD-TDP | FTLD-TDP       | Alpha                 | 3                           | 1                       | 3                 | 3             |
| Case 22 | FTLD-TDP | FTLD-TDP       | Alpha                 | 2                           | 1                       | 2                 | 2             |
| Case 23 | FTLD-TDP | FTLD-TDP       | Alpha                 | 2                           | 3                       | 3                 | 3             |
| Case 24 | FTLD-TDP | FTLD-TDP       | Alpha                 | 3                           | 0.5                     | 2                 | 3             |
| Case 25 | FTLD-TDP | FTLD-TDP       | Alpha                 | 2                           | 3                       | 2                 | 2             |
| Case 26 | FTLD-TDP | FTLD-TDP       | Alpha                 | 3                           | 3                       | 2                 | 3             |
| Case 27 | FTLD-TDP | FTLD-TDP       | Beta                  | 3                           | 2                       | 2                 | 2             |
| Case 28 | FTLD-TDP | FTLD-TDP       | Beta                  | 3                           | 3                       | 3                 | .             |
| Case 29 | FTLD-TDP | FTLD-TDP       | Beta                  | 3                           | 3                       | 3                 | .             |
| Case 30 | FTLD-TDP | FTLD-TDP       | Beta                  | 3                           | 3                       | 3                 | 3             |
| Case 31 | FTLD-TDP | LATE           | Alpha                 | 2                           | .                       | .                 | 1             |
| Case 32 | FTLD-TDP | LATE           | Alpha                 | 3                           | 2                       | 2                 | 2             |
| Case 33 | FTLD-TDP | LATE           | Alpha                 | 3                           | 1                       | 3                 | 3             |
| Case 34 | LATE     | FTLD-TDP       | Alpha                 | 3                           | 2                       | 2                 | 2             |
| Case 35 | LATE     | LATE           | Alpha                 | 1                           | 1                       | 2                 | 2             |
| Case 36 | LATE     | LATE           | Alpha                 | 2                           | 0                       | 1                 | 1             |
| Case 37 | LATE     | LATE           | Alpha                 | 2                           | 1                       | 2                 | 2             |
| Case 38 | LATE     | LATE           | Alpha                 | 2                           | 2                       | 2                 | 2             |
| Case 39 | LATE     | LATE           | Alpha                 | 3                           | 2                       | 3                 | 2             |
| Case 40 | LATE     | LATE           | Alpha                 | 2                           | 1                       | 1                 | 2             |
| Case 41 | LATE     | LATE           | Alpha                 | 2                           | 0.5                     | 2                 | 2             |
| Case 42 | LATE     | LATE           | Alpha                 | 2                           | 0                       | 1                 | 1             |
| Case 43 | LATE     | LATE           | Alpha                 | 2                           | 3                       | 0                 | 0.5           |
| Case 44 | LATE     | LATE           | Alpha                 | 2                           | 2                       | 2                 | .             |
| Case 45 | LATE     | LATE           | Alpha                 | 3                           | 1                       | 1                 | 2             |
| Case 46 | LATE     | LATE           | Alpha                 | 3                           | 1                       | 3                 | 3             |
| Case 47 | LATE     | LATE           | Beta                  | 2                           | 2                       | 0                 | 2             |
| Case 48 | LATE     | LATE           | Beta                  | 2                           | 2                       | 2                 | 3             |
| Case 49 | LATE     | LATE           | Beta                  | 3                           | 1                       | 2                 | 1             |
| Case 50 | LATE     | LATE           | Beta                  | 3                           | 2                       | 2                 | 1             |
| Case 51 | LATE     | LATE           | Beta                  | 3                           | 3                       | 3                 | 3             |
| Case 52 | LATE     | LATE           | Beta                  | 2                           | 2                       | 3                 | 1             |
| Case 53 | LATE     | LATE           | Beta                  | 2                           | 1                       | 2                 | 2             |
| Case 54 | LATE     | LATE           | Beta                  | 3                           | 2                       | 2                 | 1             |
| Case 55 | LATE     | LATE           | Beta                  | 3                           | 2                       | 2                 | 2             |
| Case 56 | LATE     | LATE           | Beta                  | 1                           | 1                       | 2                 | 1             |
| Case 57 | LATE     | LATE           | Beta                  | 2                           | 1                       | 1                 | 2             |

} cases mis-diagnosed

|         |      |      |      |   |   |   |     |
|---------|------|------|------|---|---|---|-----|
| Case 58 | LATE | LATE | Beta | 2 | 1 | 2 | 2   |
| Case 59 | LATE | LATE | Beta | 3 | 2 | 2 | 3   |
| Case 60 | LATE | LATE | Beta | 3 | 3 | 3 | 3   |
| Case 61 | LATE | LATE | Beta | 0 | 0 | 0 | 0.5 |
| Case 62 | LATE | LATE | Beta | 2 | 2 | 2 | 2   |
| Case 63 | LATE | LATE | Beta | 3 | 2 | 2 | 2   |

\* Semiquantitative range 0-3

**Supplementary Table 8. Unsupervised clustering (UK-1\* dataset)**

| <b>Cluster</b> | <b>Clustered Group<sup>1</sup></b> | <b>Types</b> | <b>UPENN<br/>LATE-NC</b> | <b>UPENN<br/>FTLD-TDP</b> | <b>Accuracy**</b> |
|----------------|------------------------------------|--------------|--------------------------|---------------------------|-------------------|
| k=2            | LATE-NC (n=31)                     |              | 24                       | 7                         | 79%               |
|                | FTLD-TDP (n=31)                    | all          | 5                        | 26                        | 83%               |
| k=3            | LATE-NC (n=31)                     |              | 24                       | 7                         | 79%               |
|                | FTLD-TDP (n=24)                    | A/B/C        | 5                        | 19                        | 83%               |
|                | FTLD-TDP (n=7)                     | A/B/E        | 0                        | 7                         | 100%              |
| k=4            | LATE-NC (n=25)                     |              | 24                       | 1                         | 97%               |
|                | FTLD-TDP (n=24)                    | A/B          | 5                        | 19                        | 83%               |
|                | FTLD-TDP (n=7)                     | A/B/E        | 0                        | 7                         | 100%              |
|                | FTLD-TDP (n=6)                     | C            | 0                        | 6                         | 100%              |

\*-Attending neuropathologist

\*\* -Accuracy is the specificity for the correct diagnosis within that cluster



**Supplementary Table 9. Unsupervised clustering (UK-2\* dataset)**

| <b>Cluster</b> | <b>Clustered Group</b> | <b>Types</b> | <b>UPENN<br/>LATE-NC</b> | <b>UPENN<br/>FTLD-TDP</b> | <b>Accuracy**</b> |
|----------------|------------------------|--------------|--------------------------|---------------------------|-------------------|
| k=2            | LATE-NC (n=38)         |              | 28                       | 10                        | 70%               |
|                | FTLD-TDP (n=24)        | all          | 1                        | 23                        | 97%               |
| k=3            | LATE (n=29)            |              | 28                       | 1                         | 97%               |
|                | FTLD-TDP (n=25)        | A/B/E        | 2                        | 23                        | 92%               |
|                | FTLD-TDP (n=9)         | A/B/C        | 0                        | 9                         | 100%              |
| k=4            | LATE-NC (n=17)         |              | 17                       | 0                         | 100%              |
|                | FTLD-TDP (n=24)        | A/B          | 12                       | 12                        | 59%               |
|                | FTLD-TDP (n=9)         | A/B/E        | 0                        | 9                         | 100%              |
|                | FTLD-TDP (n=12)        | A/B/C        | 0                        | 12                        | 100%              |

\*-Neuropathology fellow trainee

\*\* -Accuracy is the specificity for the correct diagnosis within that cluster

**Supplementary Table 10. Mann-Whitney-Wilcoxon p-values compared individual TDP-43 pathology subtype scores, comparing between FTLT-DTP Types A, B, C, D, and E, versus LATE-NC**

| <b>TDP-43 pathologic feature*</b> | <b>Amygdala</b> | <b>Anterior Cingulate</b> | <b>Superior Temporal</b> | <b>Middle Frontal</b> |
|-----------------------------------|-----------------|---------------------------|--------------------------|-----------------------|
| <b>Ropy DN</b>                    | 0.67            | <0.0001                   | <0.0001                  | <0.0001               |
| <b>NCI</b>                        | 0.14            | <0.0001                   | 0.006                    | <0.0001               |
| <b>WM GCI</b>                     | 0.005           | <0.001                    | <0.001                   | <0.0001               |
| <b>Punctate DN</b>                | 0.076           | <0.0001                   | 0.002                    | <0.0001               |
| <b>NII</b>                        | 0.44            | <0.001                    | 0.005                    | <0.0001               |
| <b>Compact PV</b>                 | 0.04            | 0.71                      | 0.91                     | 0.11                  |
| <b>GFNI</b>                       | 0.72            | 0.01                      | 0.25                     | 0.03                  |
| <b>Type C DN</b>                  | 0.05            | 0.003                     | 0.005                    | 0.003                 |

\*-NCI=neuronal cytoplasmic inclusion; WM GCI=white matter glial cytoplasmic inclusion; NII=neuronal intranuclear inclusion; DN=various types of TDP-43 immunoreactive dystrophic neurites; GFNI= granulofilamentous neuronal inclusion

**Supplemental Table 11. Clinical data for the research subject described in Fig.4, from three clinical visits starting 5 years before death**

| Clinical Data               | Years before death |     |     |
|-----------------------------|--------------------|-----|-----|
|                             | 5                  | 4   | <1  |
| MMSE Score (0-30)           | 30                 | 26  | 18  |
| CDR Global Score (0-3)      | 0                  | 0.5 | 1   |
| Apathy Yes/No               | No                 | No  | No  |
| Appetite disturbance Yes/No | No                 | No  | Yes |
| Disinhibition Yes/No        | No                 | Yes | Yes |
| Language disorder Yes/No    | Yes                | Yes | Yes |

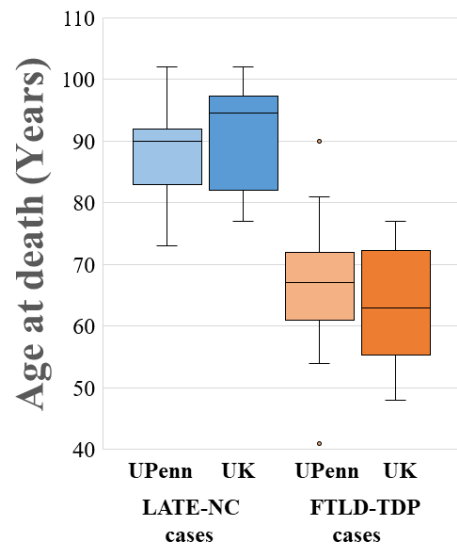

---

**Supplementary Fig. 1. Age ranges of LATE-NC and FTLD-TDP case series from UPENN and UK-ADC cohorts.** In group-wise comparisons, LATE-NC cases are older than FTLD-TDP cases ( $p < 0.0001$ ), with virtually no overlap in the age ranges. Box-and-whisker plots show the median (solid line) and whiskers indicate the minimum and maximum values.
